# Supplementary material for: Partial sulfidation for constructing Cu2O–CuS heterostructures realizing enhanced electrochemical glucose sensing
Source: Royal Society of Chemistry journal article supplement (doi:10.1039/d1nj00298h), 2021-01-01
Supplement: d1nj00298h1.pdf [file d1nj00298h1.pdf]

**Electronic Supplementary Information (ESI)**

**Partial sulfidation for constructing Cu<sub>2</sub>O-CuS heterostructures realizing enhanced electrochemical glucose sensing**

*Sai Zhang,<sup>‡</sup> Xiaoming Mou,<sup>‡</sup> Zhao Cui, Changmin Hou, Wenlong Yang, \* Hongtao Gao, and Xiliang Luo\**

S. Zhang, X. M. Mou, Z. Cui, C. M. Hou, Dr. W. L. Yang, Prof. H. T. Gao, Prof. X. L. Luo

Key Laboratory of Optic-electric Sensing and Analytical Chemistry for Life Science, MOE,

Key Laboratory of Analytical Chemistry for Life Science in Universities of Shandong,

College of Chemistry and Molecular Engineering,

Qingdao University of Science and Technology,

Qingdao, Shandong, 266042, P. R. China

E-mail: [wlyang@qust.edu.cn](mailto:wlyang@qust.edu.cn); [xiliangluo@qust.edu.cn](mailto:xiliangluo@qust.edu.cn)

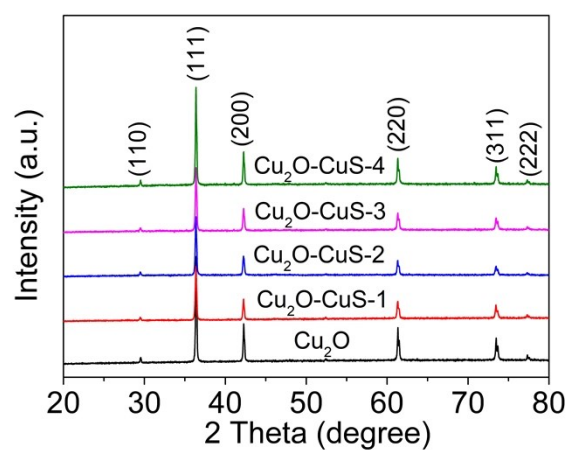

**Fig. S1** XRD patterns of  $\text{Cu}_2\text{O}$  cubes and different  $\text{Cu}_2\text{O}$ - $\text{CuS}$  hybrid structures.

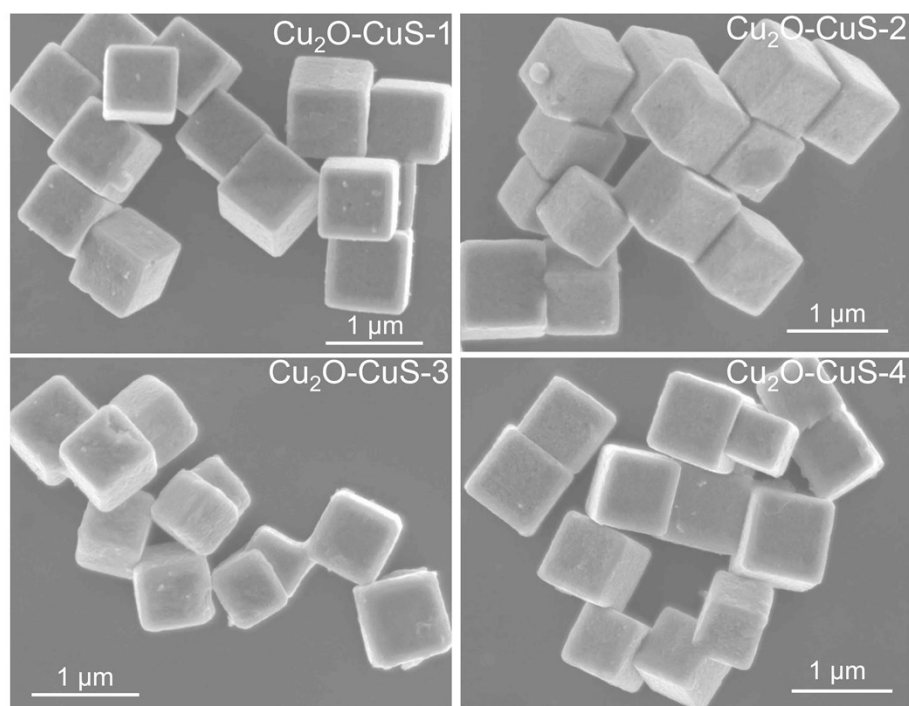

**Fig. S2** SEM images of different  $\text{Cu}_2\text{O}$ - $\text{CuS}$  hybrid structures.

$\text{Cu}_2\text{O}$ - $\text{CuS}$ -1,  $\text{Cu}_2\text{O}$ - $\text{CuS}$ -2,  $\text{Cu}_2\text{O}$ - $\text{CuS}$ -3, and  $\text{Cu}_2\text{O}$ - $\text{CuS}$ -4 were prepared with 20 mg, 30 mg, 40 mg, and 50 mg thioacetamide (TAA), respectively.

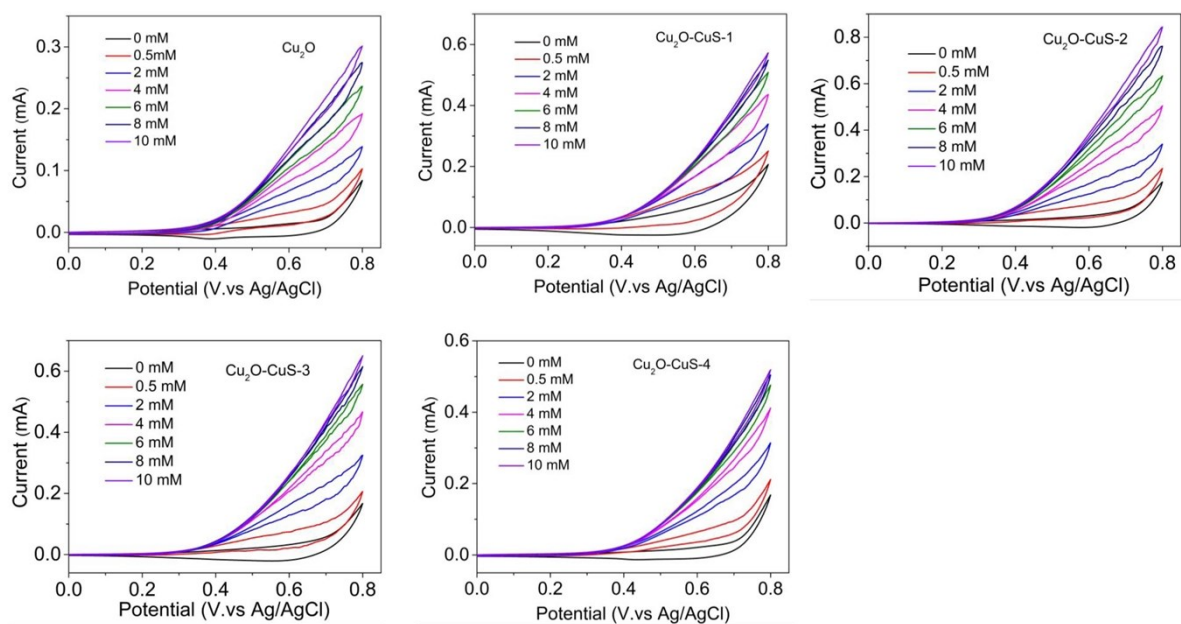

**Fig. S3** CV curves of pure Cu<sub>2</sub>O cubes and various Cu<sub>2</sub>O-CuS hybrid structures measured in 0.1 M NaOH solution with different concentrations of glucose at a scan rate of 50 mV s<sup>-1</sup>.

**Table S1** Comparison of the electrochemical performance for glucose sensing between the Cu<sub>2</sub>O-CuS-2 hybrid electrode and other transition-metal-based electrodes recently reported.

| Electrode                       | Linear range (mM) | Detection limit (μM) | Sensitivity (μA·mM <sup>-1</sup> ·cm <sup>-2</sup> ) | Reference                                       |
|---------------------------------|-------------------|----------------------|------------------------------------------------------|-------------------------------------------------|
| Cu <sub>2</sub> O-CuS-2         | 0.01–1            | 0.46                 | 1876                                                 | This work                                       |
| Cu <sub>2</sub> O/Cu            | 0.05–6.75         | 37                   | 62.29                                                | Int. J. Electrochem. Sci. 2012, 7, 12587–12600. |
| Cu <sub>2</sub> O MSs/S-MWCNTs  | 0.005–7           | 1.46                 | 581.89                                               | ACS Appl. Nano Mater. 2020, 3, 4788–4798.       |
| Cu <sub>2</sub> O/ graphene     | 0.3–3.3           | 3.3                  | 285                                                  | Biosens. Bioelectron. 2013, 45, 206–212.        |
| spiky Cu/CuO NW array           | 0.01–7            | 10                   | 1210                                                 | ACS Omega 2019, 4, 12222–12229.                 |
| rGO-Pt NW                       | 0.032–1.89        | 4.6                  | 56.11                                                | Int. J. Electrochem. Sci. 2018, 13, 4817–4826.  |
| Co <sub>3</sub> N NW/TM         | 0.0001–2.5        | 0.05                 | 3325.6                                               | Sens. Actuators, B 2018, 255, 1254–1261.        |
| W <sub>18</sub> O <sub>49</sub> | 0.06–1.6          | 0.02                 | 167                                                  | ACS Biomater. Sci. Eng. 2020, 6, 1909–1919.     |
| NiO/TiO <sub>2</sub>            | 0.005–12.1        | 1.0                  | 252.0                                                | Sci. Total Environ. 2015, 502,70–79.            |

**Table S2** DFT data for the formation energies of electroactive Cu(III) species.

| Species                  | Energy (eV) | Formation energy (eV) |
|--------------------------|-------------|-----------------------|
| Cu <sub>2</sub> O        | -61431.0703 | 5.824285              |
| Cu <sub>2</sub> O-OH     | -61456.2941 |                       |
| CuS-Cu <sub>2</sub> O    | -77222.8434 | 3.066185              |
| CuS-Cu <sub>2</sub> O-OH | -77250.8253 |                       |
| OH*                      | -31.048085  | --                    |

**Table S3** DFT data for the adsorption energies of glucose on the surface of catalysts.

| Species                                                             | Energy (eV)  | Adsorption energy (eV) |
|---------------------------------------------------------------------|--------------|------------------------|
| Cu <sub>2</sub> O                                                   | -581493.4961 | -4.6189                |
| Cu <sub>2</sub> O-C <sub>6</sub> H <sub>12</sub> O <sub>6</sub>     | -601175.6299 |                        |
| CuS-Cu <sub>2</sub> O                                               | -582448.3601 | -7.9101                |
| CuS-Cu <sub>2</sub> O-C <sub>6</sub> H <sub>12</sub> O <sub>6</sub> | -602133.7851 |                        |
| C <sub>6</sub> H <sub>12</sub> O <sub>6</sub>                       | -19677.5149  | --                     |
